# Supplementary material for: Acetylation of Cyclic AMP Receptor Protein by Acetyl Phosphate Modulates Mycobacterial Virulence
Source: PubMed Central journal article supplement (PMC9927398; doi:10.1128/spectrum.04002-22), 2023-01-26
Supplement: spectrum.04002-22-s0001.pdf [file spectrum.04002-22-s0001.pdf]

1        **Acetylation of cyclic adenosine monophosphate receptor protein by**  
2                    **acetyl phosphate modulates mycobacteria virulence**

3    *Running title:*

4    AcP-mediated CRP acetylation modulates mycobacteria virulence

5    Authors:

6    Yuchang Di<sup>1</sup>, Siyue Xu<sup>1</sup>, Mingzhe Chi<sup>1</sup>, Youwei Hu<sup>1</sup>, Xiao Zhang<sup>1</sup> Honghai Wang<sup>1</sup>,

7    Wenhong Zhang<sup>\*1,2</sup>, Xuelian Zhang<sup>\*1</sup>

8

9

10 **Table S1. Primers used in this study**

| Primer              | Sequence (5' -3' )                                    |
|---------------------|-------------------------------------------------------|
| pT7-Rv3676-C-F      | CGCCATATGGTGGACGAGATCCTGGCCAGGGCAG                    |
| pT7-Rv3676-C-R      | CCCAAGCTTTTACATCACCATCATCACCACCCTCGCTCG<br>GCGGGCCAGT |
| 193Q-F              | AACCAGGCACTGGCTGATTTTCGCTCACCGCGGCTG                  |
| 193R-F              | AACAGGGCACTGGCTGATTTTCGCTCACCGCGGCTG                  |
| 193A-F              | AACGCGGCACTGGCTGATTTTCGCTCACCGCGGCTG                  |
| 193-R               | CACCGTCTCGCGTGAGGCCCCGACCAGCT                         |
| pT7-crp-ATG-R       | TAGGCACTGGCTGATTTTCGCTCACC                            |
| pT7-crp-ATG-R       | GTTACCGTCTCGCGTGAGGCCCCG                              |
| <i>vivo</i> -test-F | AGCGTTGGCACGGCGAACCGTT                                |
| <i>vivo</i> -test-R | GCAGCCGCACAATCGCACAAAATCC                             |
| bing-DNA -F         | CTCTATGTGACGAAGCCACATCGAC                             |
| bing-DNA-R          | GTCGATGTGGGCTTCGTCACATAGAG                            |
| 6189-crRNA-F        | ATTTGACGGTCTCGCGCGACGCGCCGAA                          |
| 6189-crRNA-R        | AGCTTTCGGCGCGTCGCGCGAGACCGTCAAATCT                    |
| 6189-K193Q-         | TCGGCGCGTCGCGCGAGACCGTCAACCAGGCGCTGGCC                |
| ssDNA               | GACTTCGCCCACCGCGG                                     |
| 6189-K193R-         | TCGGCGCGTCGCGCGAGACCGTCAACCAGGCGCTGGCC                |

---

|             |                                        |
|-------------|----------------------------------------|
| ssDNA       | GACTTCGCCCACCGCGG                      |
| 6189-K193A- | TCGGCGCGTCGCGCGAGACCGTCAACGCCGCGCTGGCC |
| ssDNA       | GACTTCGCCCACCGCGG                      |
| 6188-qPCR-F | TGTCTTGGCTGCTGGTGG                     |
| 6188-qPCR-R | GTAGATGGGCGTCGGAAGAG                   |
| 6189-qPCR-F | ATCTTCCAGGGAGTCGAACC                   |
| 6189-qPCR-R | CGATCTTTCCTGCGTGAGG                    |
| 6190-qPCR-F | TGGTGCTCATCAGCCACAAG                   |
| 6190-qPCR-R | TCGGTGTAGACGTGTTGAC                    |
| 0929-qPCR-F | AGGTCAGCGGTCAATTCCAG                   |
| 0929-qPCR-R | AACTCGCCGTTGTTGGAGAT                   |
| 5700-qPCR-F | GCCACCAAGGAAGAGCAGAT                   |
| 5700-qPCR-R | GAGGCGTCGACGATCTGG                     |
| 3197-qPCR-F | CCGATCGTGTCTACCAGTG                    |
| 3197-qPCR-R | TGGTGCTCATCTTGTGCAGG                   |
| 3233-qPCR-F | TCATCATCTCGGCGAACTCG                   |
| 3233-qPCR-R | CCCGAACTTCTCCTCGTAGC                   |
| 4891-qPCR-F | ACGATCGGTGACCAGTTTCC                   |
| 4891-qPCR-R | GGATCGCCCTTCTTCCAGTT                   |
| 1919-qPCR-F | GTCTGTCGCGACGAGGATC                    |

---

12 **Supplementary Figure legends**

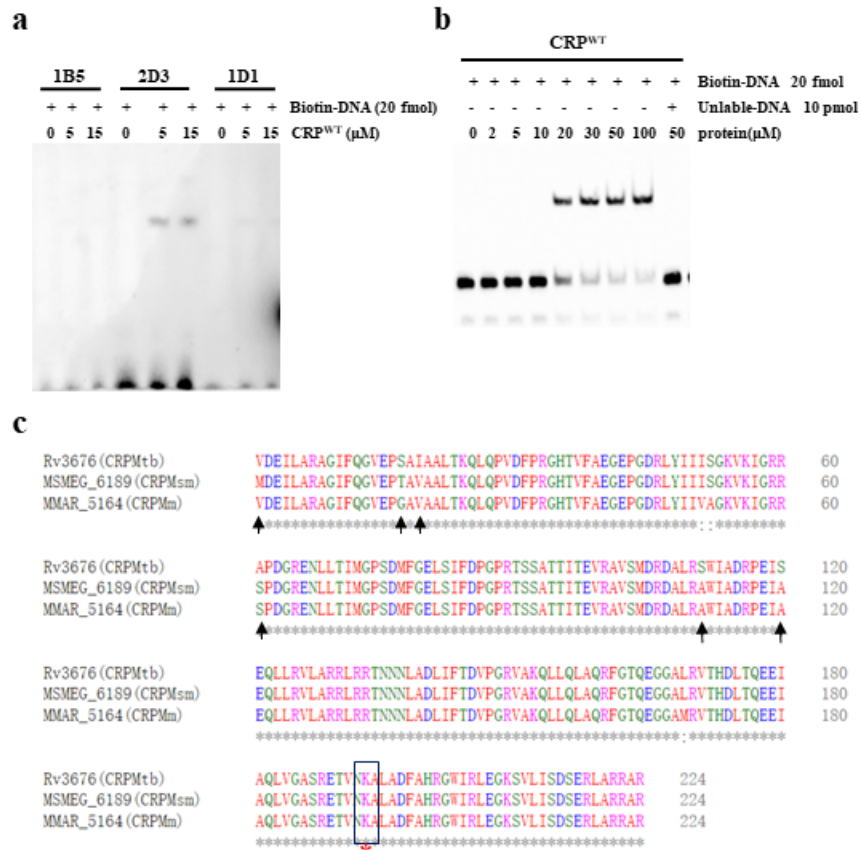

13

14 **Fig. S1. CRP protein can bind target DNA, and cAMP enhances its DNA-binding**

15 **affinity.** (a) Three target DNA sequences of the CRP protein determined previously were

16 selected to incubate with CRP for EMSA. Panel from left to right: lane 1-3: target DNA

17 1B5; lane 4-6: target DNA 2D3; lane 7-9: target DNA 1D1. (b) DNA-binding abilities of

18 CRP<sup>WT</sup> by EMSA. EMSA was used to test the binding of the indicated concentrations of

19 CRP (lanes 2 to 9) to Biotin-labeled target DNA 2D3. Lane 1 represents the labeled DNA

20 alone. (c) Conservation analysis of CRP K201 of mycobacteria through sequence

21 alignment. The black arrows denote the six different amino acids between CRP<sub>Mtb</sub> and

22 CRP<sub>Msm</sub>, and the red asterisk denotes the conserved lysine residue (K193). The result was

23 analyzed by BioEdit 7.0. EMSA results are representative of at least three independent  
24 replicates. Abbreviations: CRP, cAMP receptor protein; cAMP, cyclic adenosine  
25 monophosphate; EMSA, electrophoretic mobility shift assay; WT, wild-type; *Msm*,  
26 *Mycobacterium smegmatis*; *Mtb*, *M. tuberculosis*.

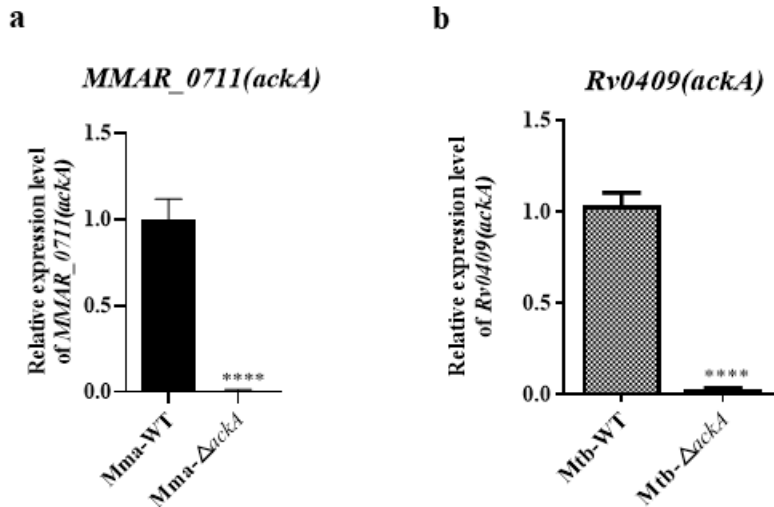

27  
28 Fig. S2. *ackA*-knockout strain was successfully constructed by transcriptional level  
29 verification in *Mma* and *Mtb*. The transcript levels of *MMAR\_0711 (ackA)* (a) and *Rv0409*  
30 (*ackA*) (b) in *ackA*-knockout strains, respectively. Bacteria were grown to  $OD_{600}=0.6$  and  
31 harvested to isolate total RNA. The transcript levels were determined by qPCR and  $2^{-\Delta\Delta Ct}$   
32 methods. The expression of the tested gene was normalized to that of 16S rRNA and  
33 compared to the wild-type strain. \*,  $P<0.05$ ; \*\*,  $P<0.01$ , ANOVA analysis. Abbreviations:  
34 *ackA*, acetate kinase; *Mma*, *Mycobacterium marine*; *Mtb*, *M. tuberculosis*; qPCR,  
35 quantitative polymerase chain reaction; ANOVA, analysis of variance.

36

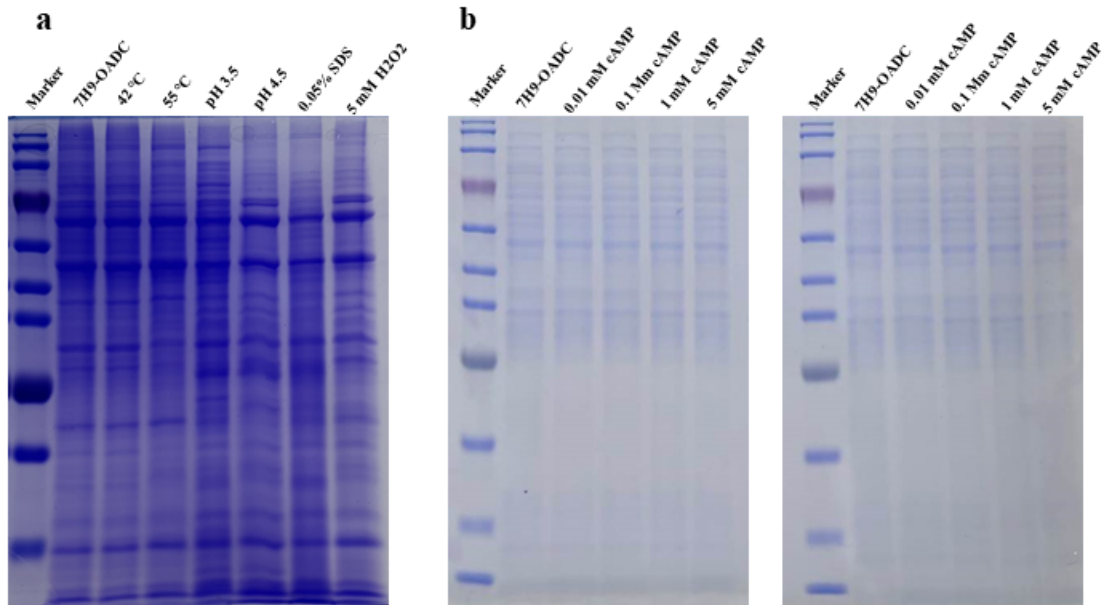

37

38 Fig. S3. **Loading control for western blotting analysis.** (a) Loading control for Fig. 4g  
 39 (a), Fig. 4h (b), and Fig. 7c (c). The strains exposed to different conditions were collected  
 40 by centrifugation. Cell extracts (20  $\mu$ g per lane) was analyzed by SDS-PAGE and stained  
 41 with Coomassie blue. Abbreviations: SDS-PAGE, sodium dodecyl-sulfate polyacrylamide  
 42 gel electrophoresis.
